# Supplementary material for: Identification of Hub Genes in Different Stages of Colorectal Cancer through an Integrated Bioinformatics Approach
Source: Int J Environ Res Public Health. 2021 May 23;18(11):5564. doi: 10.3390/ijerph18115564 (PMC8197092; doi:10.3390/ijerph18115564)
Supplement: Supplementary file 1 [file ijerph-18-05564-s001.zip]

Archive with 7 entries (7 files):
- Figure S1.pdf
- Figure S2.pdf
- Figure S3.pdf
- Figure S4.pdf
- Table S1.xlsx
- Table S2.csv
- Table S3.csv
