# Supplementary material for: Identification of Hub Genes in Different Stages of Colorectal Cancer through an Integrated Bioinformatics Approach
Source: Int J Environ Res Public Health. 2021 May 23;18(11):5564. doi: 10.3390/ijerph18115564 (PMC8197092; doi:10.3390/ijerph18115564)
Supplement: Supplementary file 1 [file ijerph-18-05564-s001.zip › Table S1.xlsx]

## Sheet: Hub genes
Top 40 Hub genes in each group
G1	G2	G3
WDR12	CDK1	NOP58
POLR1B	CDC20	WDR12
BYSL	CCNA2	GTPBP4
RRS1	CCNB1	POLR1B
PNO1	BUB1	WDR43
CIRH1A	UBE2C	RPF2
TSR1	AURKA	BRIX1
GNG2	AURKB	KIAA0020
GNG7	TOP2A	CIRH1A
WDR75	PLK1	PNO1
RBM28	MAD2L1	DCAF13
NOC3L	NCAPG	NIFK
HEATR1	KIF2C	WDR3
RRP12	CDCA8	DIEXF
NHP2	TPX2	NOP2
RSL1D1	MELK	HEATR1
DCAF13	RRM2	UTP14A
NLE1	KIF20A	DDX10
ADCY9	DLGAP5	LTV1
UTP14A	BIRC5	TEX10
DIMT1	TTK	UTP20
WDR74	CDC6	DDX31
LPAR1	CDC45	RCL1
TEX10	KIF4A	POLR1C
GCG	KIF23	POLR1D
POLR1C	PTTG1	NOLC1
CXCL12	PRC1	ABCE1
SST	FOXM1	WDR74
NOB1	CEP55	MAD2L1
RAN	DTL	EXOSC7
CCL21	EXO1	UBE2C
CD44	NEK2	RPP40
PYY	RACGAP1	RRM2
MYC	CHEK1	DDX21
GPR18	NUF2	PUS7
CCR2	MCM2	TPX2
P2RY14	HJURP	MCM2
CXCL3	CDKN3	RAN
IGF1	CENPN	CXCL8
FOXO1	MCM4	ASPM
