# Supplementary material for: Identification of Hub Genes in Different Stages of Colorectal Cancer through an Integrated Bioinformatics Approach
Source: Int J Environ Res Public Health. 2021 May 23;18(11):5564. doi: 10.3390/ijerph18115564 (PMC8197092; doi:10.3390/ijerph18115564)
Supplement: Supplementary file 1 [file ijerph-18-05564-s001.zip › Table S2.csv]

GO enrichment of Biological Process for top 40 hub genes
Group	Term	Biological Process	Count	%	PValue	Genes	Pop Hits	Pop Total	Fold Enrichment	Bonferroni	Benjamini	FDR
G1	GO:0006364	rRNA processing	10	25.64102564	6.84E-10	NOB1, PNO1, TEX10, HEATR1, WDR75, TSR1, WDR12, UTP14A, DCAF13, BYSL	214	16792	20.64928677	2.98E-07	2.98E-07	2.95E-07
	GO:0007186	G-protein coupled receptor signaling pathway	12	30.76923077	2.31E-06	PYY, CXCL12, GNG2, CCL21, SST, GNG7, P2RY14, LPAR1, GCG, CXCL3, GPR18, CCR2	899	16792	5.898483695	0.001004781	5.03E-04	4.97E-04
	GO:0042273	ribosomal large subunit biogenesis	4	10.25641026	2.19E-05	WDR74, RRS1, WDR12, NLE1	25	16792	70.70315789	0.009505495	0.003183619	0.003147109
	GO:0000462	maturation of SSU-rRNA from tricistronic rRNA transcript (SSU-rRNA, 5.8S rRNA, LSU-rRNA)	4	10.25641026	4.67E-05	HEATR1, TSR1, DCAF13, BYSL	32	16792	55.23684211	0.020173157	0.005094734	0.005036308
	GO:0071377	cellular response to glucagon stimulus	4	10.25641026	9.20E-05	ADCY9, GNG2, GNG7, GCG	40	16792	44.18947368	0.039312023	0.008020753	0.007928772
	GO:0008283	cell proliferation	7	17.94871795	1.35E-04	PYY, GNG2, MYC, GCG, IGF1, WDR12, BYSL	366	16792	8.451538683	0.057211276	0.009818181	0.009705588
	GO:0000470	maturation of LSU-rRNA	3	7.692307692	4.87E-04	RSL1D1, TEX10, NHP2	15	16792	88.37894737	0.191401095	0.0276686	0.027351299
	GO:0070098	chemokine-mediated signaling pathway	4	10.25641026	5.08E-04	CXCL12, CCL21, CXCL3, CCR2	71	16792	24.89547813	0.198607953	0.0276686	0.027351299
	GO:0009408	response to heat	3	7.692307692	0.00499958	CXCL12, SST, IGF1	48	16792	27.61842105	0.887554242	0.24220189	0.239424346
	GO:0010560	positive regulation of glycoprotein biosynthetic process	2	5.128205128	0.006596128	CCL21, IGF1	3	16792	294.5964912	0.944169706	0.261446526	0.258448287
	GO:0000469	cleavage involved in rRNA processing	2	5.128205128	0.006596128	NOB1, NHP2	3	16792	294.5964912	0.944169706	0.261446526	0.258448287
	GO:1903237	negative regulation of leukocyte tethering or rolling	2	5.128205128	0.008785415	CXCL12, CCL21	4	16792	220.9473684	0.978664144	0.302020523	0.298556984
	GO:0060326	cell chemotaxis	3	7.692307692	0.009005199	CXCL12, CCL21, LPAR1	65	16792	20.3951417	0.980630431	0.302020523	0.298556984
	GO:2000107	negative regulation of leukocyte apoptotic process	2	5.128205128	0.013149915	CXCL12, CCL21	6	16792	147.2982456	0.996884587	0.358335194	0.354225846
	GO:0000055	ribosomal large subunit export from nucleus	2	5.128205128	0.013149915	RRS1, RAN	6	16792	147.2982456	0.996884587	0.358335194	0.354225846
	GO:0032873	negative regulation of stress-activated MAPK cascade	2	5.128205128	0.013149915	MYC, FOXO1	6	16792	147.2982456	0.996884587	0.358335194	0.354225846
	GO:0043066	negative regulation of apoptotic process	5	12.82051282	0.017342805	MYC, GCG, IGF1, CD44, FOXO1	455	16792	4.855986119	0.999513269	0.444791946	0.439691121
	GO:2000406	positive regulation of T cell migration	2	5.128205128	0.021822892	CXCL12, CCL21	10	16792	88.37894737	0.999933621	0.528598942	0.522537028
	GO:0007219	Notch signaling pathway	3	7.692307692	0.026494508	MYC, WDR12, NLE1	115	16792	11.52768879	0.999991767	0.607979243	0.601007004
	GO:0045821	positive regulation of glycolytic process	2	5.128205128	0.030421688	MYC, IGF1	14	16792	63.12781955	0.999998587	0.631612198	0.624368938
	GO:0030490	maturation of SSU-rRNA	2	5.128205128	0.030421688	NOB1, UTP14A	14	16792	63.12781955	0.999998587	0.631612198	0.624368938
	GO:0090026	positive regulation of monocyte chemotaxis	2	5.128205128	0.034693462	CXCL12, CCR2	16	16792	55.23684211	0.999999794	0.657667365	0.650125308
	GO:0090280	positive regulation of calcium ion import	2	5.128205128	0.034693462	CXCL12, GCG	16	16792	55.23684211	0.999999794	0.657667365	0.650125308
	GO:0002407	dendritic cell chemotaxis	2	5.128205128	0.036822476	CCL21, CCR2	17	16792	51.9876161	0.999999921	0.668941649	0.6612703
	GO:0014911	positive regulation of smooth muscle cell migration	2	5.128205128	0.043182143	MYC, IGF1	20	16792	44.18947368	0.999999996	0.753096573	0.744460144
	GO:0090023	positive regulation of neutrophil chemotaxis	2	5.128205128	0.047399203	CCL21, CXCL3	22	16792	40.1722488	0.999999999	0.79484817	0.785732939
G2	GO:0007067	mitotic nuclear division	16	40	4.07E-18	PLK1, CDC6, AURKB, AURKA, CCNA2, CDC20, TPX2, PTTG1, NUF2, CDK1, BIRC5, NEK2, KIF2C, CENPN, BUB1, CEP55	248	16792	27.08387097	1.30E-15	1.30E-15	1.08E-15
	GO:0051301	cell division	17	42.5	2.14E-17	UBE2C, CDCA8, NCAPG, CDC6, AURKA, CCNA2, CDC20, TPX2, CCNB1, PTTG1, NUF2, CDK1, BIRC5, NEK2, KIF2C, BUB1, MAD2L1	350	16792	20.39028571	6.81E-15	3.41E-15	2.83E-15
	GO:0007062	sister chromatid cohesion	10	25	1.57E-12	CDC20, PLK1, NUF2, CDCA8, BIRC5, KIF2C, CENPN, BUB1, AURKB, MAD2L1	103	16792	40.75728155	4.98E-10	1.66E-10	1.38E-10
	GO:0031145	anaphase-promoting complex-dependent catabolic process	9	22.5	9.12E-12	CDC20, CCNB1, PTTG1, UBE2C, PLK1, CDK1, AURKB, MAD2L1, AURKA	79	16792	47.82531646	2.90E-09	7.25E-10	6.02E-10
	GO:0000086	G2/M transition of mitotic cell cycle	10	25	2.12E-11	TPX2, CCNB1, MELK, PLK1, CHEK1, CDK1, BIRC5, NEK2, FOXM1, AURKA	137	16792	30.64233577	6.73E-09	1.35E-09	1.12E-09
	GO:0042787	protein ubiquitination involved in ubiquitin-dependent protein catabolic process	9	22.5	1.91E-09	CDC20, CCNB1, PTTG1, UBE2C, PLK1, CDK1, AURKB, MAD2L1, AURKA	153	16792	24.69411765	6.09E-07	9.64E-08	8.00E-08
	GO:0006260	DNA replication	9	22.5	2.12E-09	RRM2, CDC45, EXO1, CHEK1, CDK1, MCM4, CDC6, DTL, MCM2	155	16792	24.37548387	6.75E-07	9.64E-08	8.00E-08
	GO:0000281	mitotic cytokinesis	6	15	5.90E-09	RACGAP1, KIF4A, PLK1, KIF23, KIF20A, CEP55	29	16792	86.85517241	1.88E-06	2.35E-07	1.95E-07
	GO:0000082	G1/S transition of mitotic cell cycle	7	17.5	1.20E-07	RRM2, CDC45, CDK1, MCM4, CDC6, CDKN3, MCM2	102	16792	28.80980392	3.82E-05	4.24E-06	3.52E-06
	GO:0051439	regulation of ubiquitin-protein ligase activity involved in mitotic cell cycle	5	12.5	2.13E-07	CDC20, CCNB1, UBE2C, PLK1, CDK1	23	16792	91.26086957	6.78E-05	6.78E-06	5.62E-06
	GO:0051256	mitotic spindle midzone assembly	4	10	6.43E-07	RACGAP1, KIF4A, KIF23, AURKB	8	16792	209.9	2.05E-04	1.86E-05	1.54E-05
	GO:0051437	positive regulation of ubiquitin-protein ligase activity involved in regulation of mitotic cell cycle transition	6	15	8.49E-07	CDC20, CCNB1, UBE2C, PLK1, CDK1, MAD2L1	76	16792	33.14210526	2.70E-04	2.25E-05	1.87E-05
	GO:0000910	cytokinesis	5	12.5	4.49E-06	PRC1, PLK1, BIRC5, KIF23, KIF20A	48	16792	43.72916667	0.001427022	1.10E-04	9.12E-05
	GO:0007049	cell cycle	7	17.5	9.93E-06	CDC20, HJURP, FOXM1, AURKB, AURKA, CDKN3, MCM2	217	16792	13.54193548	0.003153287	2.26E-04	1.87E-04
	GO:0007094	mitotic spindle assembly checkpoint	4	10	1.28E-05	PLK1, TTK, BUB1, MAD2L1	20	16792	83.96	0.004077471	2.72E-04	2.26E-04
	GO:0007059	chromosome segregation	5	12.5	1.82E-05	TOP2A, NUF2, HJURP, NEK2, CENPN	68	16792	30.86764706	0.005764185	3.48E-04	2.89E-04
	GO:0008283	cell proliferation	8	20	1.86E-05	TPX2, MELK, PLK1, CDK1, KIF2C, BUB1, DLGAP5, AURKB	366	16792	9.175956284	0.005899	3.48E-04	2.89E-04
	GO:0000083	regulation of transcription involved in G1/S transition of mitotic cell cycle	4	10	1.99E-05	RRM2, CDC45, CDK1, CDC6	23	16792	73.00869565	0.006296909	3.51E-04	2.91E-04
	GO:0051436	negative regulation of ubiquitin-protein ligase activity involved in mitotic cell cycle	5	12.5	2.16E-05	CDC20, CCNB1, UBE2C, CDK1, MAD2L1	71	16792	29.56338028	0.006839203	3.61E-04	3.00E-04
	GO:0007018	microtubule-based movement	5	12.5	3.63E-05	RACGAP1, KIF4A, KIF23, KIF2C, KIF20A	81	16792	25.91358025	0.011490392	5.78E-04	4.80E-04
	GO:0006270	DNA replication initiation	4	10	5.48E-05	CDC45, MCM4, CDC6, MCM2	32	16792	52.475	0.017286467	7.93E-04	6.58E-04
	GO:0007093	mitotic cell cycle checkpoint	4	10	5.48E-05	CHEK1, TTK, BUB1, MAD2L1	32	16792	52.475	0.017286467	7.93E-04	6.58E-04
	GO:0032467	positive regulation of cytokinesis	4	10	8.52E-05	RACGAP1, KIF23, CDC6, AURKB	37	16792	45.38378378	0.026734604	0.001129055	9.37E-04
	GO:0007080	mitotic metaphase plate congression	4	10	8.52E-05	CCNB1, CDCA8, KIF2C, CEP55	37	16792	45.38378378	0.026734604	0.001129055	9.37E-04
	GO:0051983	regulation of chromosome segregation	3	7.5	1.46E-04	KIF2C, BUB1, AURKB	8	16792	157.425	0.045333694	0.001855601	0.001540499
	GO:0030071	regulation of mitotic metaphase/anaphase transition	3	7.5	1.87E-04	UBE2C, PLK1, CDC6	9	16792	139.9333333	0.057823217	0.002166434	0.001798549
	GO:1904668	positive regulation of ubiquitin protein ligase activity	3	7.5	1.87E-04	CDC20, UBE2C, PLK1	9	16792	139.9333333	0.057823217	0.002166434	0.001798549
	GO:1901796	regulation of signal transduction by p53 class mediator	5	12.5	1.91E-04	TPX2, EXO1, CHEK1, AURKB, AURKA	124	16792	16.92741935	0.058862426	0.002166434	0.001798549
	GO:0006268	DNA unwinding involved in DNA replication	3	7.5	2.34E-04	TOP2A, MCM4, MCM2	10	16792	125.94	0.071649011	0.00247789	0.002057116
	GO:0034501	protein localization to kinetochore	3	7.5	2.34E-04	CDK1, TTK, AURKB	10	16792	125.94	0.071649011	0.00247789	0.002057116
	GO:0007051	spindle organization	3	7.5	6.18E-04	TTK, AURKB, AURKA	16	16792	78.7125	0.178442653	0.006338478	0.005262132
	GO:0046777	protein autophosphorylation	5	12.5	6.61E-04	MELK, TTK, NEK2, AURKB, AURKA	172	16792	12.20348837	0.189624527	0.006568378	0.005452993
	GO:0006890	retrograde vesicle-mediated transport, Golgi to ER	4	10	9.04E-04	RACGAP1, KIF4A, KIF23, KIF2C	82	16792	20.47804878	0.249841127	0.008707284	0.007228688
	GO:0031572	G2 DNA damage checkpoint	3	7.5	9.73E-04	PLK1, CHEK1, DTL	20	16792	62.97	0.266145007	0.009096862	0.007552112
	GO:0019886	antigen processing and presentation of exogenous peptide antigen via MHC class II	4	10	0.001260953	RACGAP1, KIF4A, KIF23, KIF2C	92	16792	18.25217391	0.330507958	0.011456656	0.009511187
	GO:0001578	microtubule bundle formation	3	7.5	0.0015245	PRC1, PLK1, KIF20A	25	16792	50.376	0.384401919	0.013102462	0.010877515
	GO:0000070	mitotic sister chromatid segregation	3	7.5	0.0015245	PLK1, NEK2, MAD2L1	25	16792	50.376	0.384401919	0.013102462	0.010877515
	GO:0045931	positive regulation of mitotic cell cycle	3	7.5	0.001912445	CCNB1, CDK1, BIRC5	28	16792	44.97857143	0.455963992	0.016004147	0.013286461
	GO:0006281	DNA repair	5	12.5	0.002094084	PTTG1, EXO1, CHEK1, CDK1, FOXM1	235	16792	8.931914894	0.486557303	0.017074837	0.014175336
	GO:0007052	mitotic spindle organization	3	7.5	0.002194392	CCNB1, TTK, AURKA	30	16792	41.98	0.502710736	0.017445416	0.014482987
	GO:0016925	protein sumoylation	4	10	0.002509602	TOP2A, CDCA8, BIRC5, AURKB	117	16792	14.35213675	0.550246889	0.019464717	0.016159388
	GO:0051726	regulation of cell cycle	4	10	0.002958646	CCNB1, PLK1, FOXM1, DTL	124	16792	13.54193548	0.610247797	0.02240118	0.018597206
	GO:0090307	mitotic spindle assembly	3	7.5	0.003150293	TPX2, BIRC5, NEK2	36	16792	34.98333333	0.633359832	0.023297514	0.019341332
	GO:0018107	peptidyl-threonine phosphorylation	3	7.5	0.003505055	CHEK1, CDK1, TTK	38	16792	33.14210526	0.672597695	0.025331991	0.021030332
	GO:0000079	regulation of cyclin-dependent protein serine/threonine kinase activity	3	7.5	0.003689118	CCNA2, CDC6, CDKN3	39	16792	32.29230769	0.691276329	0.026069765	0.021642824
	GO:0006468	protein phosphorylation	6	15	0.003885714	PLK1, BIRC5, NEK2, BUB1, AURKB, AURKA	456	16792	5.523684211	0.710054978	0.026862109	0.022300619
	GO:0000022	mitotic spindle elongation	2	5	0.004639813	PRC1, KIF23	2	16792	419.8	0.772110419	0.030342511	0.025190009
	GO:0000915	actomyosin contractile ring assembly	2	5	0.004639813	RACGAP1, KIF23	2	16792	419.8	0.772110419	0.030342511	0.025190009
	GO:0007077	mitotic nuclear envelope disassembly	3	7.5	0.004675418	CCNB1, PLK1, CDK1	44	16792	28.62272727	0.774688093	0.030342511	0.025190009
	GO:0048146	positive regulation of fibroblast proliferation	3	7.5	0.00696989	CCNA2, CCNB1, CDC6	54	16792	23.32222222	0.891844496	0.044328501	0.03680102
	GO:0006977	DNA damage response, signal transduction by p53 class mediator resulting in cell cycle arrest	3	7.5	0.009103534	CCNB1, CDK1, AURKA	62	16792	20.31290323	0.9454251	0.054523146	0.045264499
	GO:0031577	spindle checkpoint	2	5	0.009258647	BIRC5, AURKB	4	16792	209.9	0.948075498	0.054523146	0.045264499
	GO:0016321	female meiosis chromosome segregation	2	5	0.009258647	PLK1, TTK	4	16792	209.9	0.948075498	0.054523146	0.045264499
	GO:0046602	regulation of mitotic centrosome separation	2	5	0.009258647	CHEK1, NEK2	4	16792	209.9	0.948075498	0.054523146	0.045264499
	GO:0006915	apoptotic process	6	15	0.009619891	TPX2, MELK, CDK1, BIRC5, BUB1, MCM2	567	16792	4.442328042	0.95376113	0.055620459	0.046175475
	GO:0043161	proteasome-mediated ubiquitin-dependent protein catabolic process	4	10	0.011555832	CDC20, UBE2C, CDK1, MAD2L1	203	16792	8.271921182	0.975181152	0.065620616	0.054477493
	GO:0031536	positive regulation of exit from mitosis	2	5	0.013856596	UBE2C, BIRC5	6	16792	139.9333333	0.988171121	0.075972371	0.063071403
	GO:0045143	homologous chromosome segregation	2	5	0.013856596	PTTG1, PLK1	6	16792	139.9333333	0.988171121	0.075972371	0.063071403
	GO:0051988	regulation of attachment of spindle microtubules to kinetochore	2	5	0.016147767	RACGAP1, NEK2	7	16792	119.9428571	0.994354525	0.087033726	0.072254414
	GO:0000076	DNA replication checkpoint	2	5	0.018433751	CDC45, CDC6	8	16792	104.95	0.997305748	0.097698878	0.081108502
	GO:0043066	negative regulation of apoptotic process	5	12.5	0.020708612	PLK1, CDK1, BIRC5, MAD2L1, AURKA	455	16792	4.613186813	0.998711764	0.107956373	0.089624159
	GO:0008284	positive regulation of cell proliferation	5	12.5	0.022382932	CDC20, PRC1, BIRC5, TTK, FOXM1	466	16792	4.504291845	0.999252398	0.11480278	0.095307968
	GO:0055015	ventricular cardiac muscle cell development	2	5	0.022990203	CCNB1, CDK1	10	16792	83.96	0.999386441	0.116045785	0.096339897
	GO:0018105	peptidyl-serine phosphorylation	3	7.5	0.034050217	PLK1, CDK1, TTK	125	16792	10.0752	0.999983573	0.16776387	0.139275665
	GO:0007095	mitotic G2 DNA damage checkpoint	2	5	0.034291357	CCNA2, CDK1	15	16792	55.97333333	0.999984827	0.16776387	0.139275665
	GO:1904355	positive regulation of telomere capping	2	5	0.036536254	NEK2, AURKB	16	16792	52.475	0.999992761	0.176038315	0.146145016
	GO:0000920	cell separation after cytokinesis	2	5	0.041010804	KIF20A, CEP55	18	16792	46.64444444	0.999998353	0.194648295	0.161594811
	GO:0051276	chromosome organization	2	5	0.04324048	PTTG1, CDCA8	19	16792	44.18947368	0.999999214	0.202212832	0.167874804
	GO:1900182	positive regulation of protein localization to nucleus	2	5	0.047684688	PLK1, CDK1	21	16792	39.98095238	0.999999821	0.219764214	0.182445762
	GO:0060045	positive regulation of cardiac muscle cell proliferation	2	5	0.049899243	CCNB1, CDK1	22	16792	38.16363636	0.999999915	0.226685131	0.188191429
G3	GO:0006364	rRNA processing	17	44.73684211	2.75E-21	LTV1, NOP58, PNO1, TEX10, WDR3, RPP40, HEATR1, DDX21, NOLC1, WDR12, DIEXF, WDR43, EXOSC7, RCL1, UTP20, UTP14A, DCAF13	214	16792	35.10378751	5.45E-19	5.45E-19	5.31E-19
	GO:0000462	maturation of SSU-rRNA from tricistronic rRNA transcript (SSU-rRNA, 5.8S rRNA, LSU-rRNA)	5	13.15789474	6.86E-07	WDR3, HEATR1, UTP20, DIEXF, DCAF13	32	16792	69.04605263	1.36E-04	6.79E-05	6.62E-05
	GO:0000463	maturation of LSU-rRNA from tricistronic rRNA transcript (SSU-rRNA, 5.8S rRNA, LSU-rRNA)	3	7.894736842	1.68E-04	RPF2, WDR12, GTPBP4	9	16792	147.2982456	0.03280058	0.011115924	0.010835219
	GO:0045815	positive regulation of gene expression, epigenetic	4	10.52631579	3.41E-04	POLR1B, POLR1C, POLR1D, DDX21	62	16792	28.50933786	0.065216188	0.016857127	0.016431442
	GO:0006362	transcription elongation from RNA polymerase I promoter	3	7.894736842	0.001976665	POLR1B, POLR1C, POLR1D	30	16792	44.18947368	0.324138476	0.067583384	0.065876733
	GO:0006363	termination of RNA polymerase I transcription	3	7.894736842	0.002110061	POLR1B, POLR1C, POLR1D	31	16792	42.76400679	0.341791522	0.067583384	0.065876733
	GO:0006361	transcription initiation from RNA polymerase I promoter	3	7.894736842	0.002389312	POLR1B, POLR1C, POLR1D	33	16792	40.1722488	0.377274684	0.067583384	0.065876733
	GO:0010501	RNA secondary structure unwinding	3	7.894736842	0.004216166	DDX31, DDX21, DDX10	44	16792	30.1291866	0.566804258	0.1043501	0.101714997
	GO:0000056	ribosomal small subunit export from nucleus	2	5.263157895	0.010970008	LTV1, RAN	5	16792	176.7578947	0.887416842	0.24134017	0.235245721
	GO:0000480	endonucleolytic cleavage in 5'-ETS of tricistronic rRNA transcript (SSU-rRNA, 5.8S rRNA, LSU-rRNA)	2	5.263157895	0.013149915	RCL1, UTP20	6	16792	147.2982456	0.927266553	0.260368325	0.253793367
	GO:0007067	mitotic nuclear division	4	10.52631579	0.017088063	ASPM, TPX2, NOLC1, RAN	248	16792	7.127334465	0.967047175	0.288679298	0.281389417
	GO:0000447	endonucleolytic cleavage in ITS1 to separate SSU-rRNA from 5.8S rRNA and LSU-rRNA from tricistronic rRNA transcript (SSU-rRNA, 5.8S rRNA, LSU-rRNA)	2	5.263157895	0.017495715	RCL1, UTP20	8	16792	110.4736842	0.969645595	0.288679298	0.281389417
	GO:0009303	rRNA transcription	2	5.263157895	0.026131524	NIFK, POLR1B	12	16792	73.64912281	0.994714806	0.398003214	0.387952627
	GO:0000470	maturation of LSU-rRNA	2	5.263157895	0.032559869	TEX10, NOP2	15	16792	58.91929825	0.998575798	0.460489579	0.448861054
	GO:0051301	cell division	4	10.52631579	0.041398427	TPX2, UBE2C, RAN, MAD2L1	350	16792	5.050225564	0.999768606	0.546459231	0.532659756
	GO:0000027	ribosomal large subunit assembly	2	5.263157895	0.045292938	BRIX1, RPF2	21	16792	42.08521303	0.999896656	0.560500112	0.546346069
