# Supplementary material for: Identification of Hub Genes in Different Stages of Colorectal Cancer through an Integrated Bioinformatics Approach
Source: Int J Environ Res Public Health. 2021 May 23;18(11):5564. doi: 10.3390/ijerph18115564 (PMC8197092; doi:10.3390/ijerph18115564)
Supplement: Supplementary file 1 [file ijerph-18-05564-s001.zip › Table S3.csv]

Apoptosis related genes
Group	Gene.Symbol	P.value	Fold.Change
G1	PDCD2L	2.71E-07	3.224696683
	TRIB3	1.09E-06	4.220186233
	CSE1L	1.98E-06	2.863030383
	TNFRSF12A	7.84E-06	2.679424983
	PDCD11	1.16E-05	1.673700433
	MRPS30	1.58E-05	1.930887233
	PTRH2	1.58E-05	2.066149
	BIRC5	4.90E-05	2.591852983
	PDCD2	5.28E-05	1.987884383
	FXR1	6.97E-05	1.477616767
	TP53	0.000123933	2.00265905
	NCKAP1	0.000124814	1.525971583
	BCL2L12	0.000148367	1.8874848
	TRAF5	0.000156	3.7190187
	DFFA	0.00017318	1.6766792
	FAIM	0.000226487	2.303130667
	DAP3	0.000396819	1.62548185
	TNFRSF10C	0.000523258	2.174506117
	PPP1R13L	0.000694389	1.950248717
	PDCD4	2.09E-05	-2.819748717
	CD14	3.24E-05	-3.725081167
	XIAP	4.56E-05	-1.415766867
	TNFSF10	4.71E-05	-1.935937633
	UNC5C	7.39E-05	-5.11597065
	SH3GLB1	0.000146306	-1.5134928
	BCAP29	0.000440538	-1.953535767
	SGK1	0.00055744	-4.630017133
	FAS	0.000567469	-1.669156267
G2	CSE1L	1.35E-05	2.313596544
	CTNNBL1	0.000118399	1.498519707
	SULF1	0.000165067	3.614894138
	BIRC7	0.000173521	1.406278492
	STK4	0.000401682	1.510831294
	DAP3	0.000517186	1.266794414
	TNFRSF6B	0.000751778	3.485878014
	ELMO2	0.000985226	1.362776129
	TNFRSF12A	0.00104507	2.428183636
	EIF2AK2	0.001191351	1.337351967
	IL1A	0.001557757	1.6179434
	NAE1	0.001602798	1.316244964
	RAD21	0.001697462	1.241886981
	TRIB3	0.00203218	4.127511733
	DIDO1	0.002265069	1.353835163
	TNFRSF11B	0.002610928	1.784846369
	ESPL1	0.003529166	1.445198869
	STK3	0.004087866	1.4322537
	IER3	0.004370282	1.707792531
	PDCD5	0.005806464	1.5139218
	E2F1	0.00617452	1.40526285
	CD40	0.007862421	1.26185236
	PDCD2L	0.008797426	1.676937286
	UNC5C	1.23E-05	-2.06549375
	NFKB1	1.90E-05	-1.176996567
	CYCS	4.00E-05	-2.08376941
	TNFSF10	8.12E-05	-2.09170313
	TNFRSF14	0.000114682	-1.377341342
	NTN1	0.000118017	-2.404638914
	MAGI3	0.000207345	-1.8165819
	TXNL1	0.000213032	-1.242709157
	ROCK1	0.000224266	-1.358432219
	SEMA6A	0.000425461	-3.013102136
	DAPK2	0.00058875	-1.428262721
	CD27	0.000609882	-2.40082119
	DNASE1L3	0.000708278	-2.917207729
	CLU	0.00136327	-2.288846279
	SH3GLB1	0.001690983	-1.198309925
	P2RX1	0.001862233	-1.4094286
	GADD45A	0.001906714	-1.296389081
	PDCD4	0.00208236	-2.499132643
	MOAP1	0.00269155	-1.181255607
	TNFSF12	0.00276529	-1.4490876
	FAS	0.003361994	-1.718367893
	BMF	0.004985812	-1.401072833
	DCC	0.005866555	-1.199947358
	GZMA	0.009611901	-1.465632544
G3	TRIB3	2.17E-11	11.6521275
	CSE1L	4.99E-11	4.97114665
	TRAF5	1.13E-10	3.07159175
	ESPL1	1.19E-09	2.82668495
	DFFA	1.26E-09	2.4285393
	TNFRSF12A	1.30E-05	4.31252
	BIRC5	7.28E-05	2.740110367
	DIDO1	0.000681454	2.769973233
	SULF1	0.01147701	4.084589333
	PDCD4	2.82E-14	-6.68105475
	TNFSF10	1.50E-06	-2.1866043
	CD27	1.87E-06	-2.4528906
	RIPK1	5.03E-06	-1.609181967
	PTK2B	2.22E-05	-1.780963467
	SH3GLB1	3.04E-05	-1.498770933
	FAS	0.000342046	-2.3263034
	CIDEC	0.00059945	-2.042145267
	DNASE1L3	0.001582022	-4.772077333
