# Supplementary figures and images for: Identification of Hub Genes in Different Stages of Colorectal Cancer through an Integrated Bioinformatics Approach
Source: MDPI journal article supplement (doi:10.3390/ijerph18115564), 2021-05-23

Figure S1: Heatmap showing the expression levels of robust DEGs across all groups

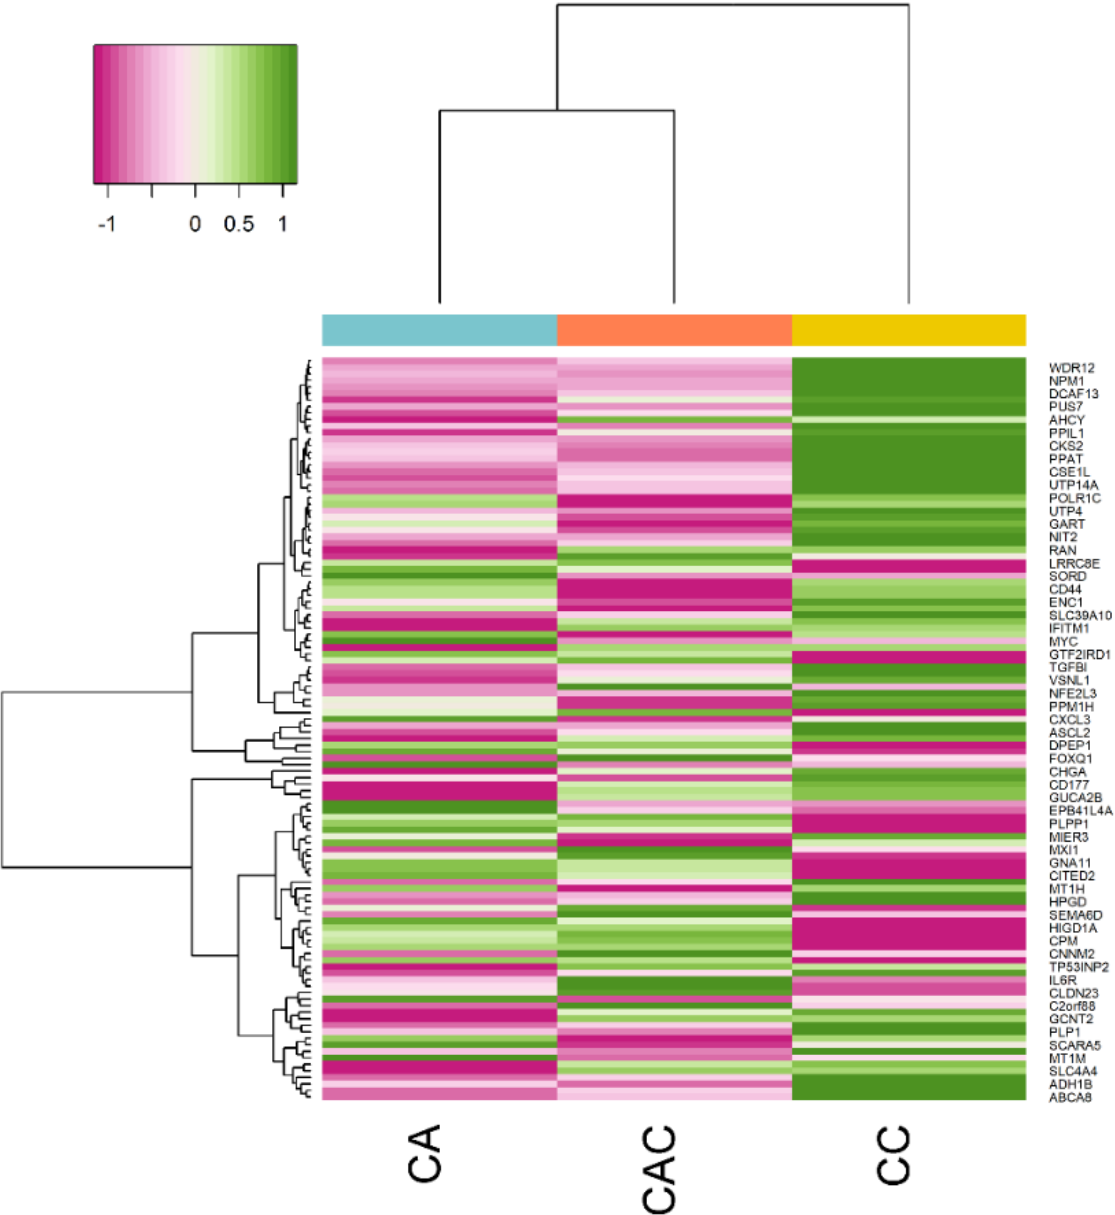

Supplement: s1 [file s1]

Figure S2: PPI network of DEGs from G1 constructed in Cytoscape with String-db.

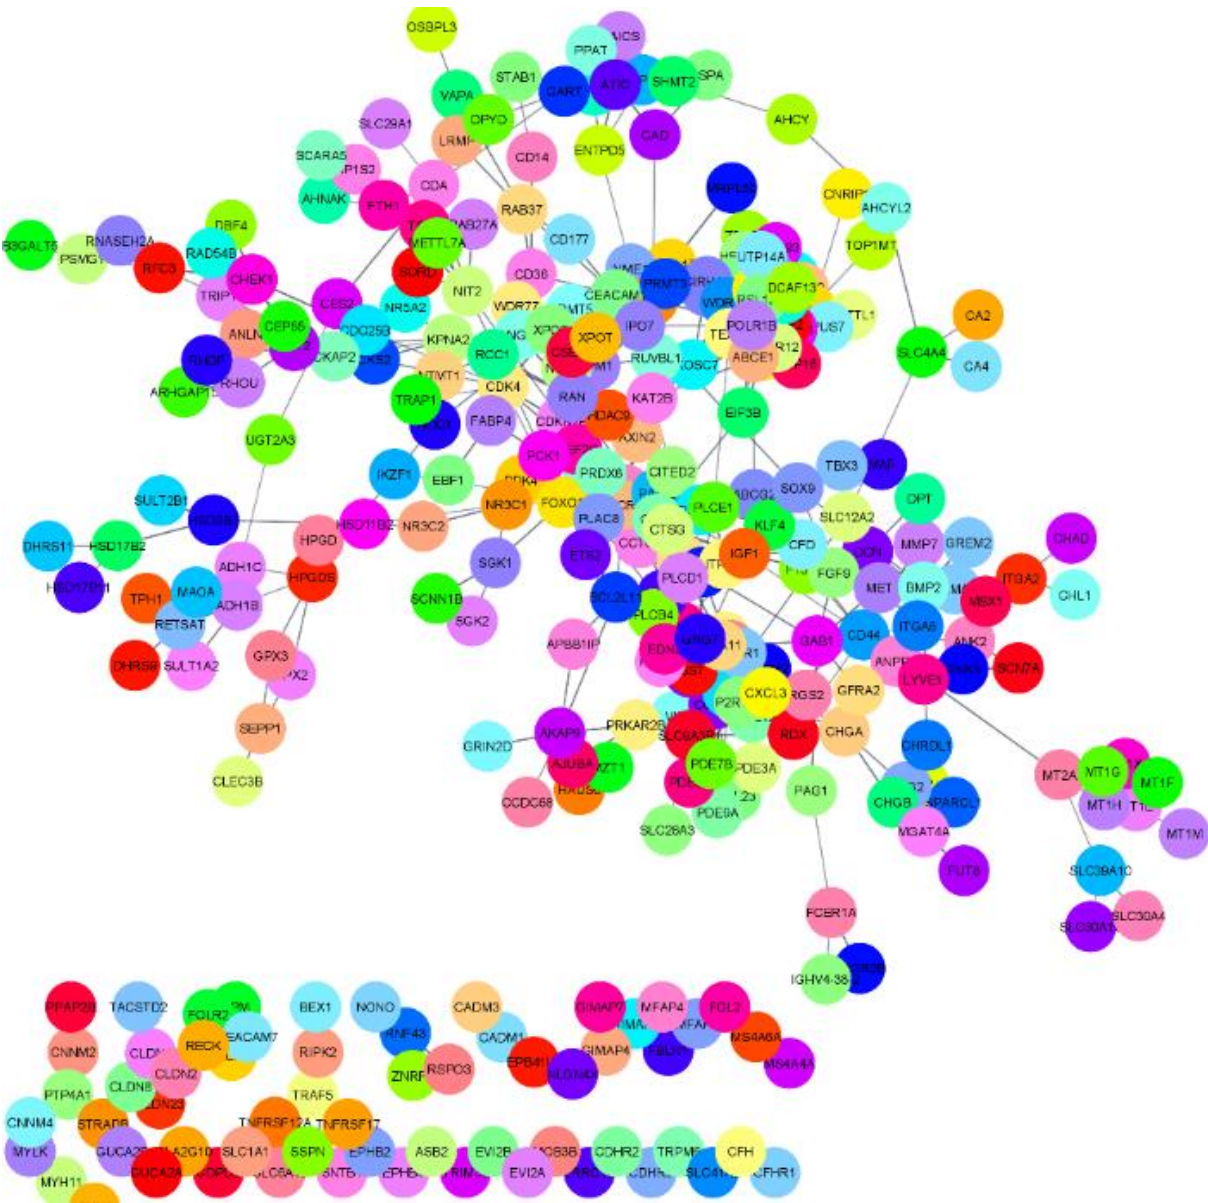

Supplement: s1 [file s1]

Figure S4: PPI network of DEGs from G3 constructed in Cytoscape with String-db.

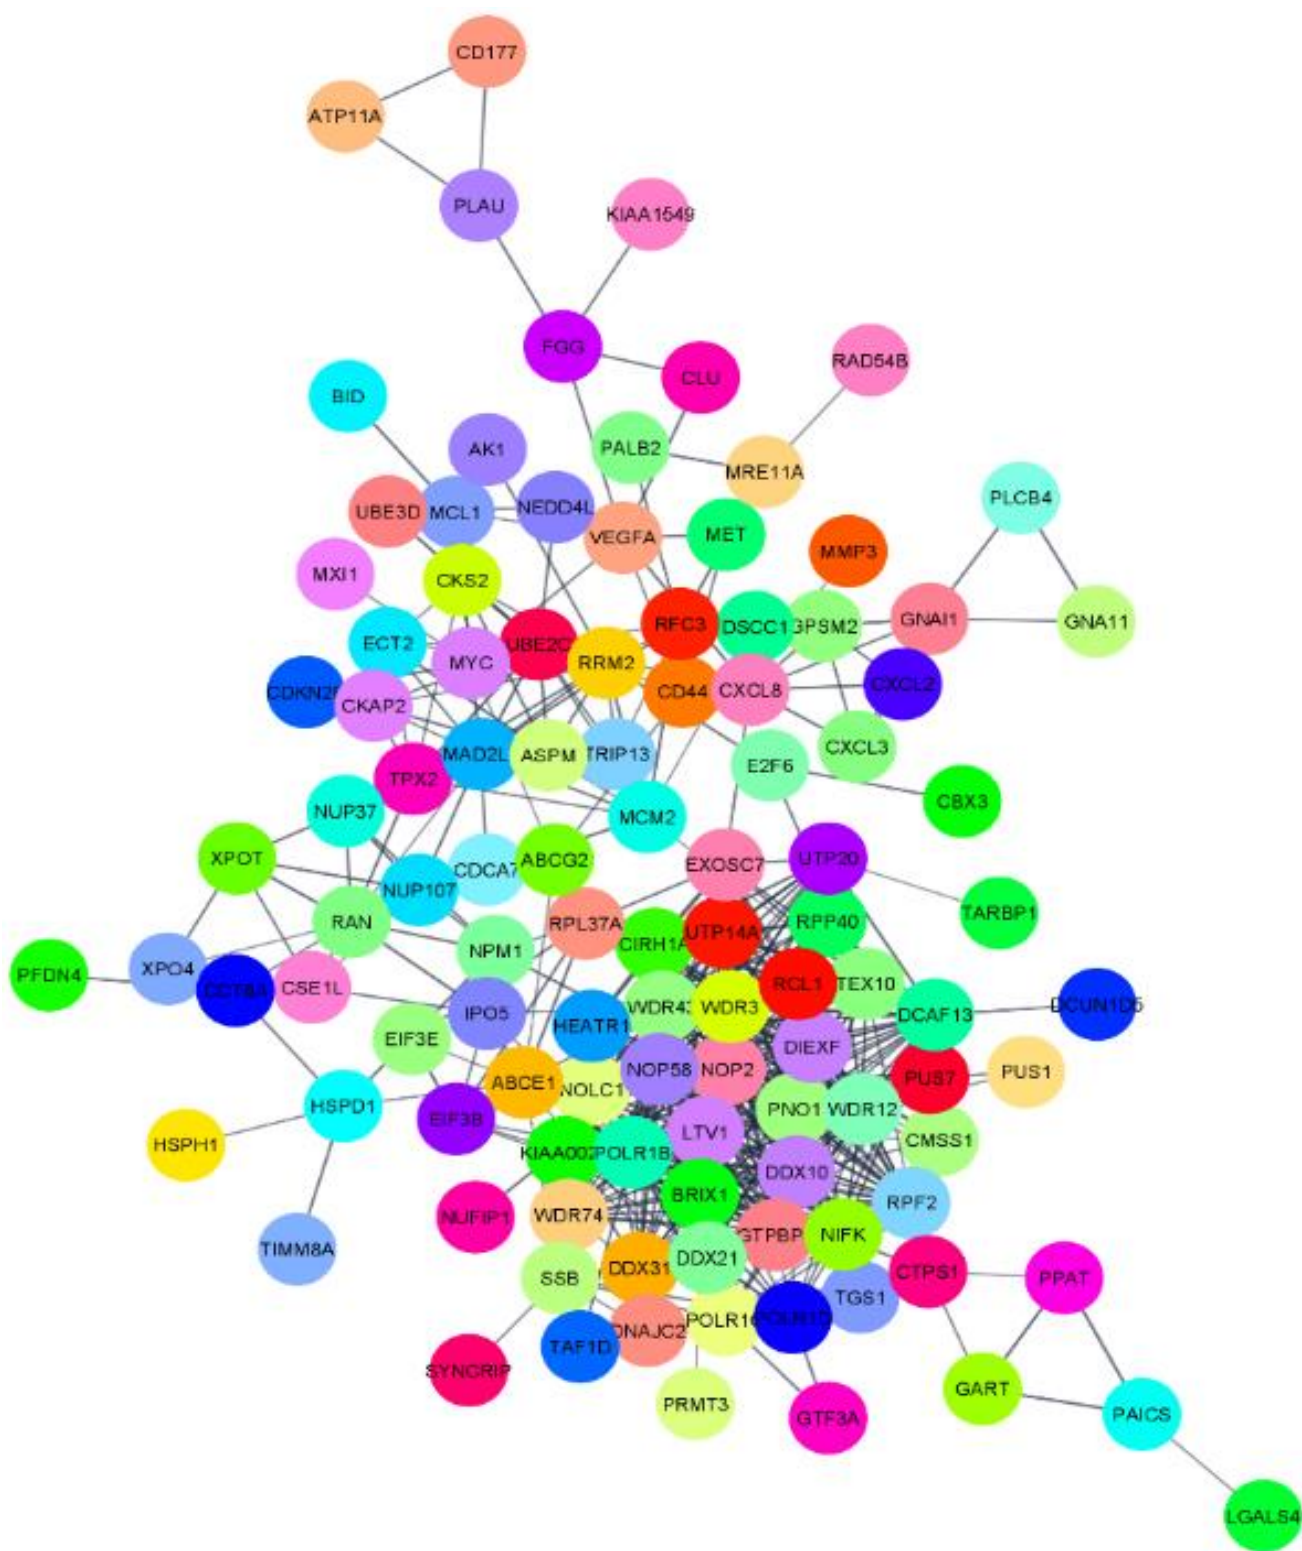

Supplement: s1 [file s1]

Figure S3: PPI network of DEGs from G2 constructed in Cytoscape with String-db.

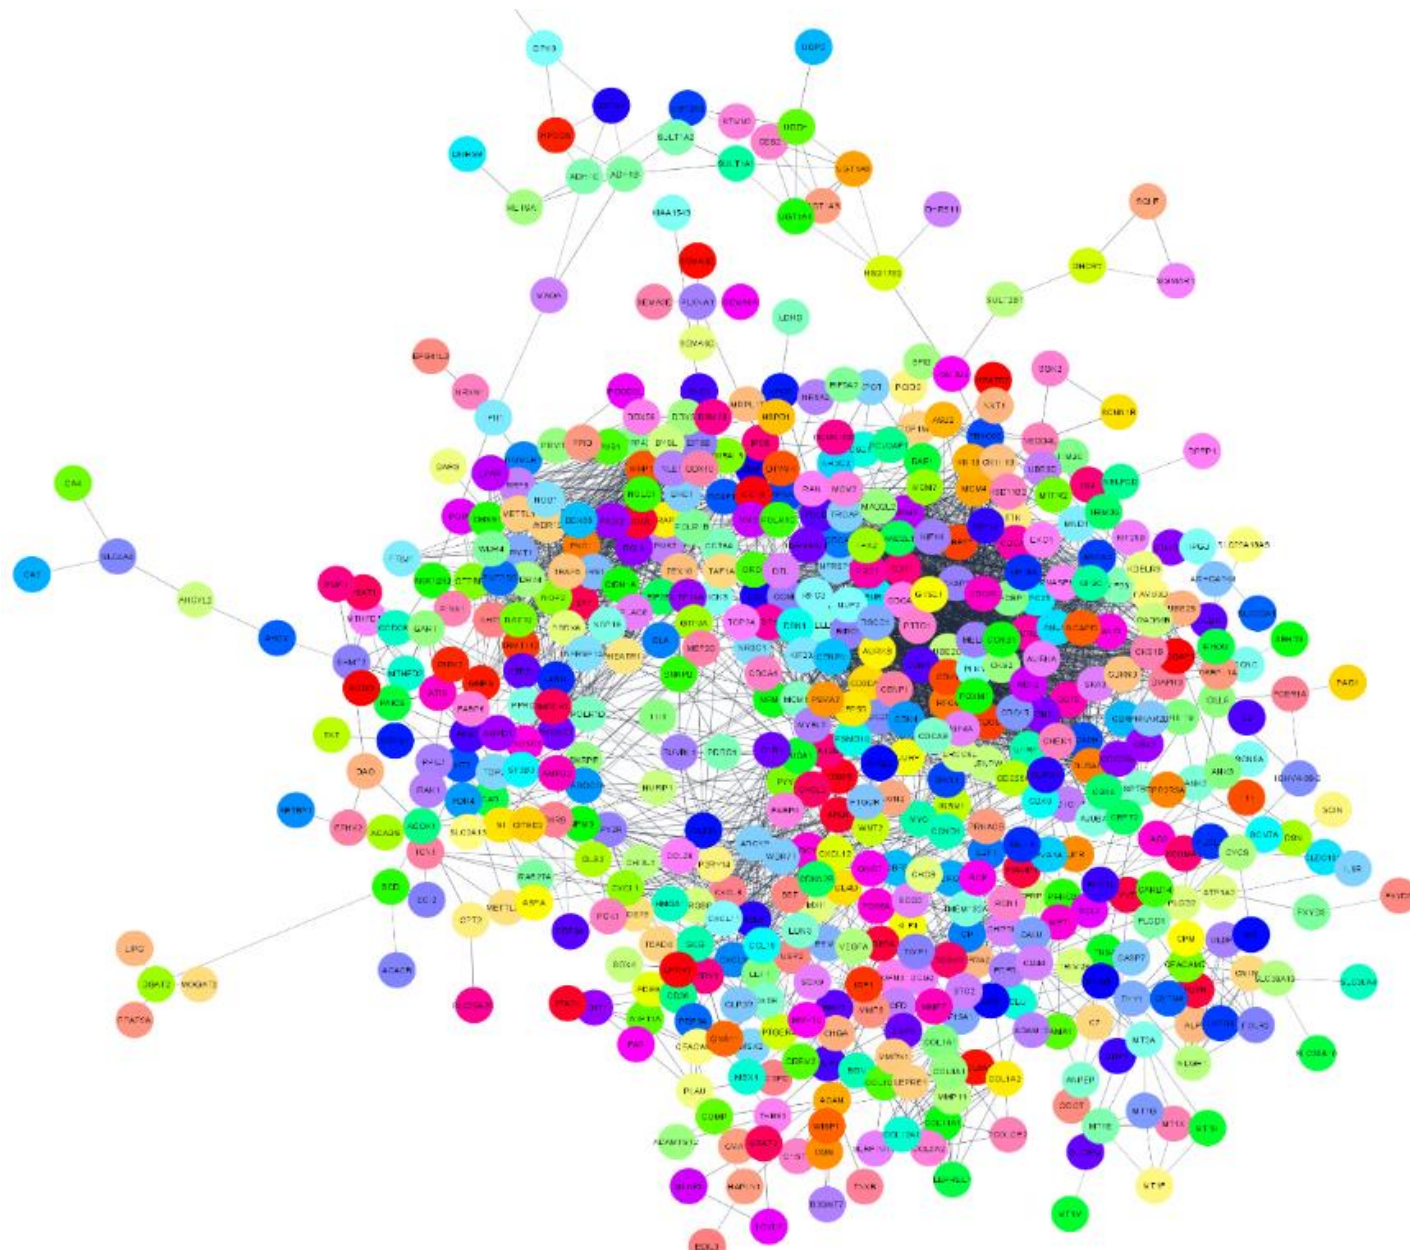

Supplement: s1 [file s1]
